# Supplementary material for: Infection Heterogeneity and Microbiota Differences in Chicks Infected by Salmonella enteritidis
Source: MDPI journal article supplement (doi:10.3390/microorganisms9081705), 2021-08-11
Supplement: s1 [file s1]

# Infection heterogeneity and microbiota differences in chicks infected by *Salmonella enteritidis*

Shu Wu <sup>1,2</sup>, Guanglei Cong <sup>2</sup>, Qianyun Zhang <sup>2</sup>, Hong Yao <sup>2</sup>, Zhenxin Wang <sup>2</sup>, Kelang Kang <sup>1,2</sup>, Xi He <sup>1,\*</sup>, and Shourong Shi <sup>2,3,4,\*</sup>

<sup>1</sup> College of Animal Science and Technology, Hunan Agricultural University, Changsha 410128, China;

wushu223759@163.com (S.W.); kangkelang@126.com (K.K.)

<sup>2</sup> Department of Feed and Nutrition, Poultry Institute, Chinese Academy of Agricultural Sciences,

Yangzhou 225125, China; MZ120181027@yzu.edu.cn (G.C.);

17858765721@163.com (Q.Z.); Ravenpeach@163.com (H.Y.);

17863856330@163.com (Z.W.)

<sup>3</sup> Institute of Effective Evaluation of Feed and Feed Additive (Poultry Institute), Ministry of Agriculture, Yangzhou 225125, China

<sup>4</sup> Jiangsu Co-Innovation Center for the Prevention and Control of Important Animal Infectious Disease and Zoonose, Yangzhou University, Yangzhou 225009, China

\* Correspondence: hexi111@126.com (X.H.); ssr236@163.com (S.S.)

Table S1. Tissue *Salmonella* loads of all slaughtered chicks (n = 48).

| Chick number | Liver <i>Salmonella</i> loads (log <sub>10</sub> CFU/g) | Spleen <i>Salmonella</i> loads (log <sub>10</sub> CFU/g) | Sample grouping |
|--------------|---------------------------------------------------------|----------------------------------------------------------|-----------------|
| 35           | 3.301                                                   | 5.134                                                    | Group R         |
| 28           | 3.380                                                   | 5.048                                                    |                 |
| 31           | 3.477                                                   | 5.001                                                    |                 |
| 48           | 3.256                                                   | 4.997                                                    |                 |
| 27           | 2.603                                                   | 4.571                                                    |                 |
| 5            | 0.000                                                   | 4.544                                                    |                 |
| 14           | 3.080                                                   | 4.508                                                    |                 |
| 8            | 2.904                                                   | 4.466                                                    |                 |
| 26           | 3.146                                                   | 4.236                                                    | Group S         |
| 3            | 2.303                                                   | 4.049                                                    |                 |
| 39           | 2.303                                                   | 3.806                                                    |                 |
| 42           | 0.000                                                   | 3.764                                                    |                 |
| 25           | 0.000                                                   | 3.732                                                    |                 |
| 33           | 0.000                                                   | 3.623                                                    |                 |
| 1            | 0.000                                                   | 3.580                                                    |                 |
| 47           | 2.303                                                   | 3.447                                                    |                 |
| 23           | 2.303                                                   | 3.380                                                    |                 |
| 29           | 0.000                                                   | 3.380                                                    |                 |
| 12           | 0.000                                                   | 3.343                                                    |                 |
| 18           | 0.000                                                   | 3.301                                                    |                 |
| 7            | 2.303                                                   | 3.256                                                    |                 |
| 17           | 0.000                                                   | 3.256                                                    |                 |
| 19           | 2.603                                                   | 3.256                                                    |                 |
| 37           | 0.000                                                   | 3.204                                                    |                 |
| 16           | 0.000                                                   | 3.146                                                    |                 |
| 22           | 0.000                                                   | 3.146                                                    |                 |
| 30           | 3.343                                                   | 3.080                                                    |                 |
| 46           | 2.303                                                   | 3.080                                                    |                 |
| 15           | 2.603                                                   | 3.000                                                    |                 |
| 41           | 2.303                                                   | 3.000                                                    |                 |
| 34           | 0.000                                                   | 3.000                                                    |                 |
| 40           | 0.000                                                   | 2.904                                                    |                 |
| 20           | 0.000                                                   | 2.904                                                    |                 |
| 6            | 2.303                                                   | 2.779                                                    |                 |
| 9            | 2.303                                                   | 2.779                                                    |                 |
| 21           | 2.303                                                   | 2.779                                                    |                 |
| 43           | 0.000                                                   | 2.779                                                    |                 |
| 44           | 0.000                                                   | 2.779                                                    |                 |
| 13           | 3.000                                                   | 2.603                                                    |                 |
| 32           | 2.303                                                   | 2.603                                                    |                 |

|    |       |       |         |
|----|-------|-------|---------|
| 38 | 2.303 | 2.603 | Group S |
| 10 | 2.303 | 2.603 |         |
| 4  | 0.000 | 2.603 |         |
| 2  | 0.000 | 2.603 |         |
| 11 | 0.000 | 2.603 |         |
| 24 | 2.303 | 2.303 |         |
| 36 | 2.303 | 2.303 |         |
| 45 | 0.000 | 2.303 |         |

**Table S2. Details of sequencing data.**

| Sample name <sup>1</sup> | Effective reads | Good's coverage (%) | OTU number |
|--------------------------|-----------------|---------------------|------------|
| R1                       | 53040           | 0.997               | 601        |
| R2                       | 51735           | 0.997               | 663        |
| R3                       | 55739           | 0.999               | 368        |
| R4                       | 55698           | 0.997               | 601        |
| R5                       | 58617           | 0.997               | 543        |
| R6                       | 58629           | 0.998               | 538        |
| R7                       | 42192           | 0.996               | 1008       |
| R8                       | 56171           | 0.996               | 942        |
| S1                       | 56833           | 0.995               | 870        |
| S2                       | 60920           | 0.997               | 679        |
| S3                       | 49545           | 0.997               | 849        |
| S4                       | 49244           | 0.996               | 826        |
| S5                       | 54498           | 0.997               | 689        |
| S6                       | 45061           | 0.997               | 768        |
| S7                       | 43113           | 0.997               | 767        |
| S8                       | 66094           | 0.999               | 390        |

<sup>1</sup>R = the selected *S.enteritidis* resistant chicks; S = the selected *S.enteritidis* susceptible chicks.

**Table S3. Alpha diversity analysis of cecal microbiota (n = 8).**

|                 | ACE          | Chao1        | PD_whole_tree | Shannon   | Simpson   |
|-----------------|--------------|--------------|---------------|-----------|-----------|
| Group R         | 730.83±83.97 | 703.96±79.86 | 53.84±4.87    | 5.34±0.26 | 0.91±0.02 |
| Group S         | 808.22±63.09 | 803.41±61.53 | 67.56±8.15    | 5.52±0.26 | 0.90±0.03 |
| <i>p</i> -value | 0.279        | 0.279        | 0.160         | 0.382     | 1.000     |

Group R = the selected *S.enteritidis* resistant chicks; Group S = the selected *S.enteritidis*-susceptible chicks. Differences between two groups were tested by Wilcoxon rank-sum test.

**Table S4. Beta diversity analysis of cecal microbiota (n = 8).**

|                 | binary_jaccard         | bray_curtis | unweighted_unifrac     | weighted_unifrac |
|-----------------|------------------------|-------------|------------------------|------------------|
| Group R         | 0.67±0.02 <sup>a</sup> | 0.67±0.03   | 0.59±0.22 <sup>a</sup> | 0.31±0.02        |
| Group S         | 0.58±0.02 <sup>b</sup> | 0.62±0.02   | 0.54±0.04 <sup>b</sup> | 0.27±0.01        |
| <i>p</i> -value | 0.002                  | 0.073       | 0.039                  | 0.070            |

Group R = the selected *S.enteritidis* resistant chicks; Group S = the selected *S.enteritidis*-susceptible chicks. Differences between two groups were tested by Wilcoxon rank-sum test. In the same column, values with different letters are significantly different between two groups ( $p < 0.05$ ).

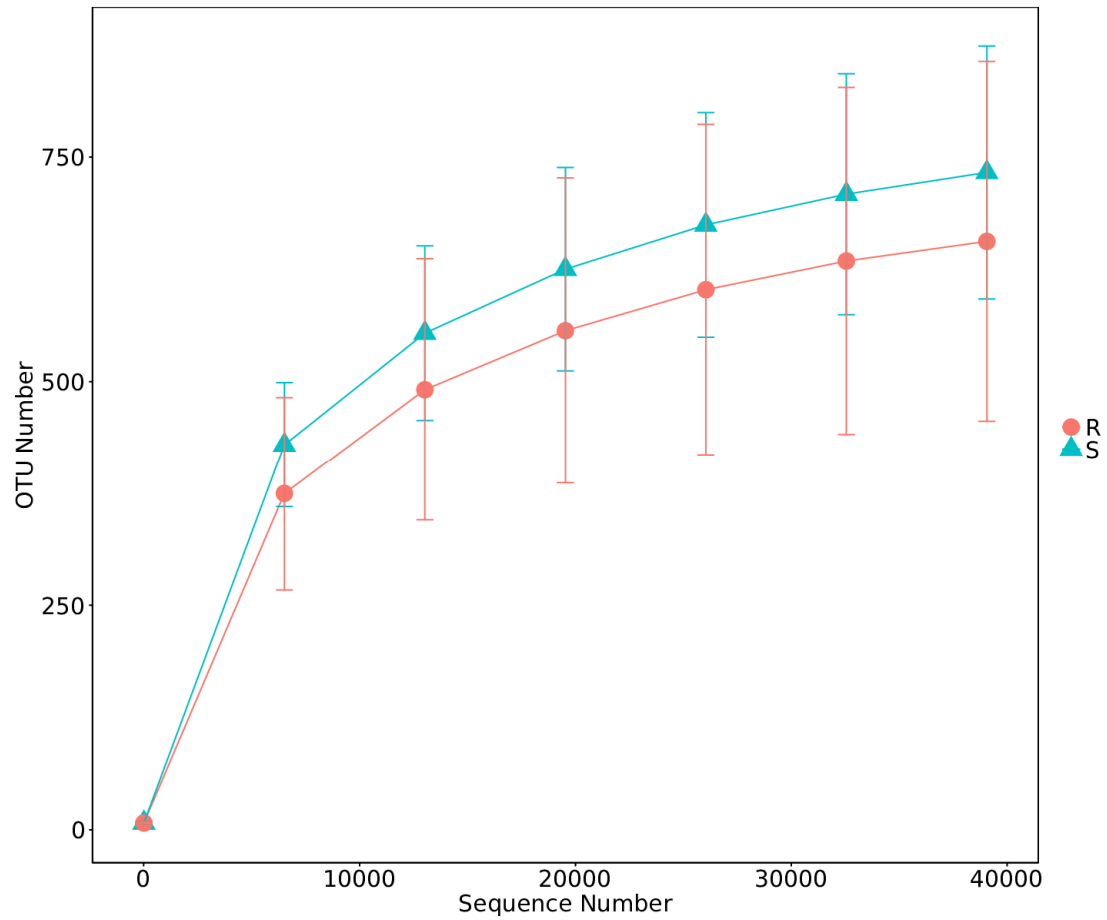

**Figure S1.** Rarefaction curves of the observed OTUs ( $n = 8$ ). S = the selected *S. enteritidis*-susceptible chicks; R = the selected *S. enteritidis*-resistant chicks.
